# Supplementary material
Source: ML conference proceedings conference paper supplement (https://openreview.net/forum?id=xUoNgR1Byy)

Utility Distributions for pythia\_70m

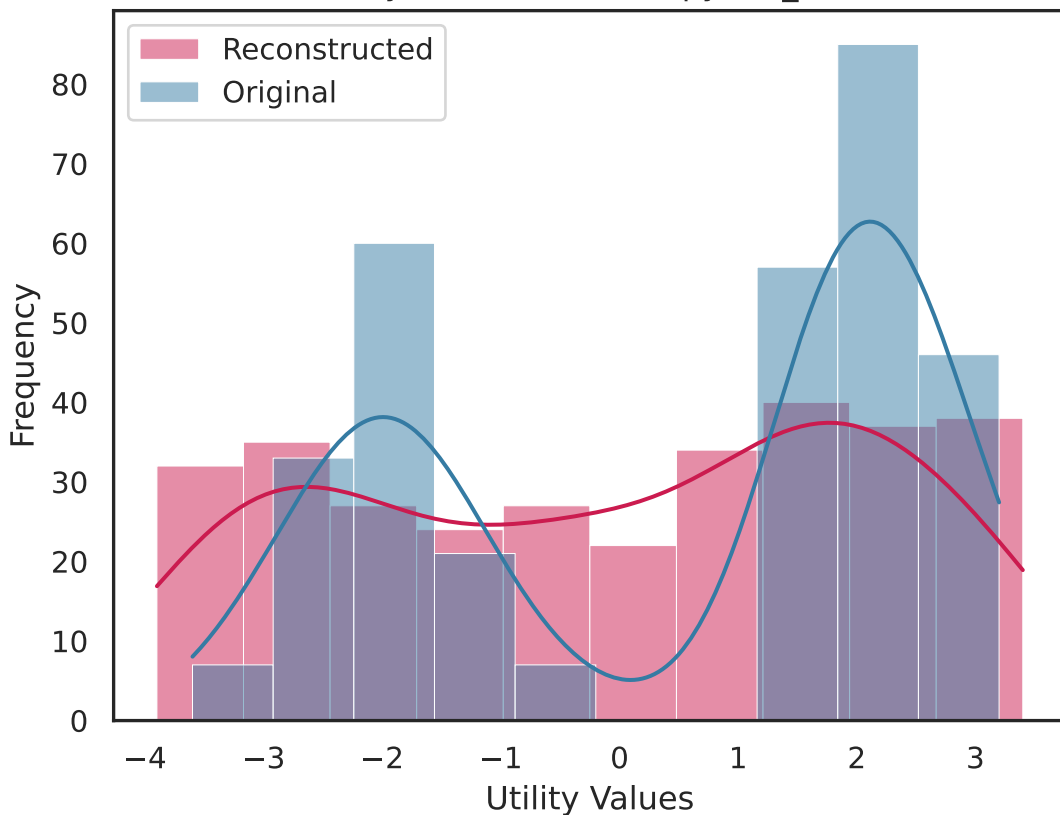

Supplement: supplementary_material [file attachment]

Distribution of reconstruction errors for gpt\_neo\_125m utility values

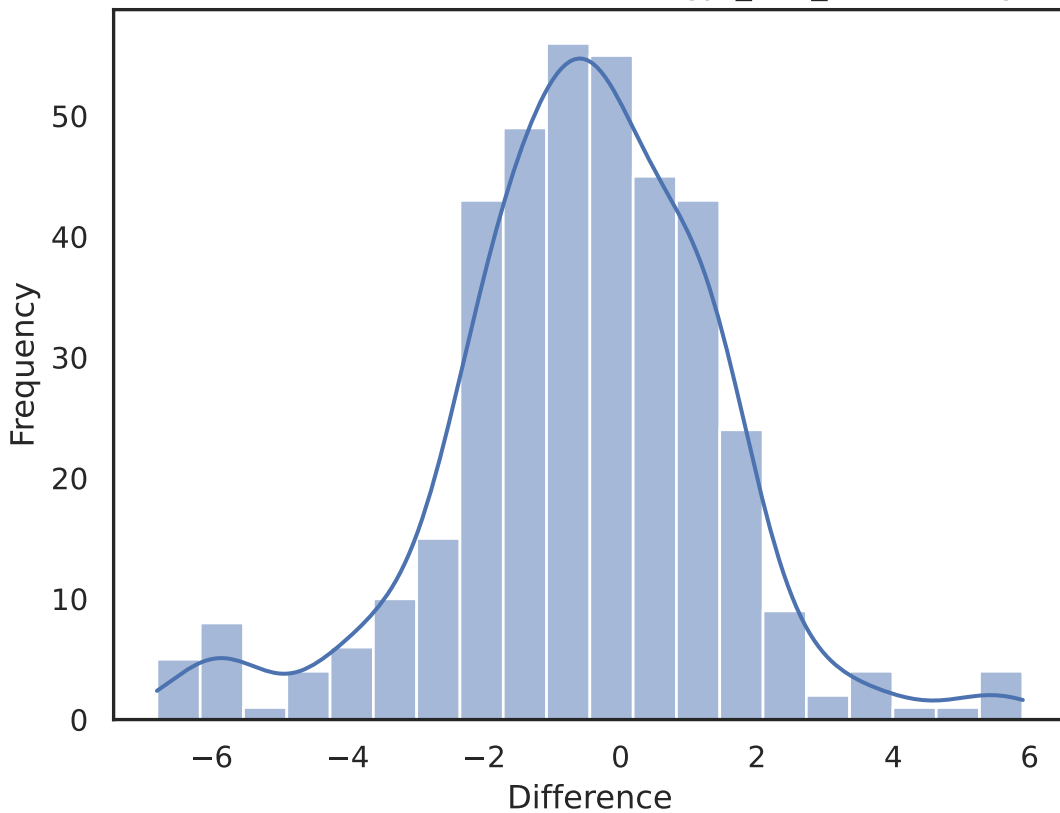

Supplement: supplementary_material [file attachment]

Distribution of reconstruction errors for pythia\_70m utility values

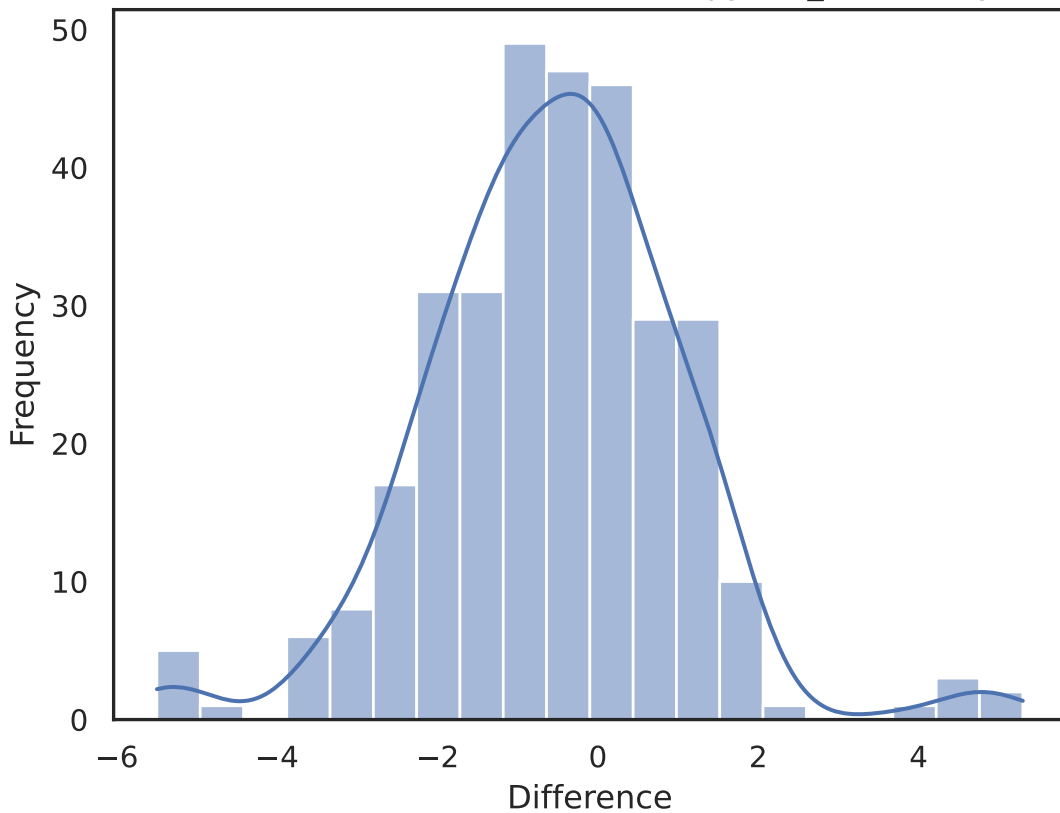

Supplement: supplementary_material [file attachment]

Utility Distributions for gpt\_neo\_125m

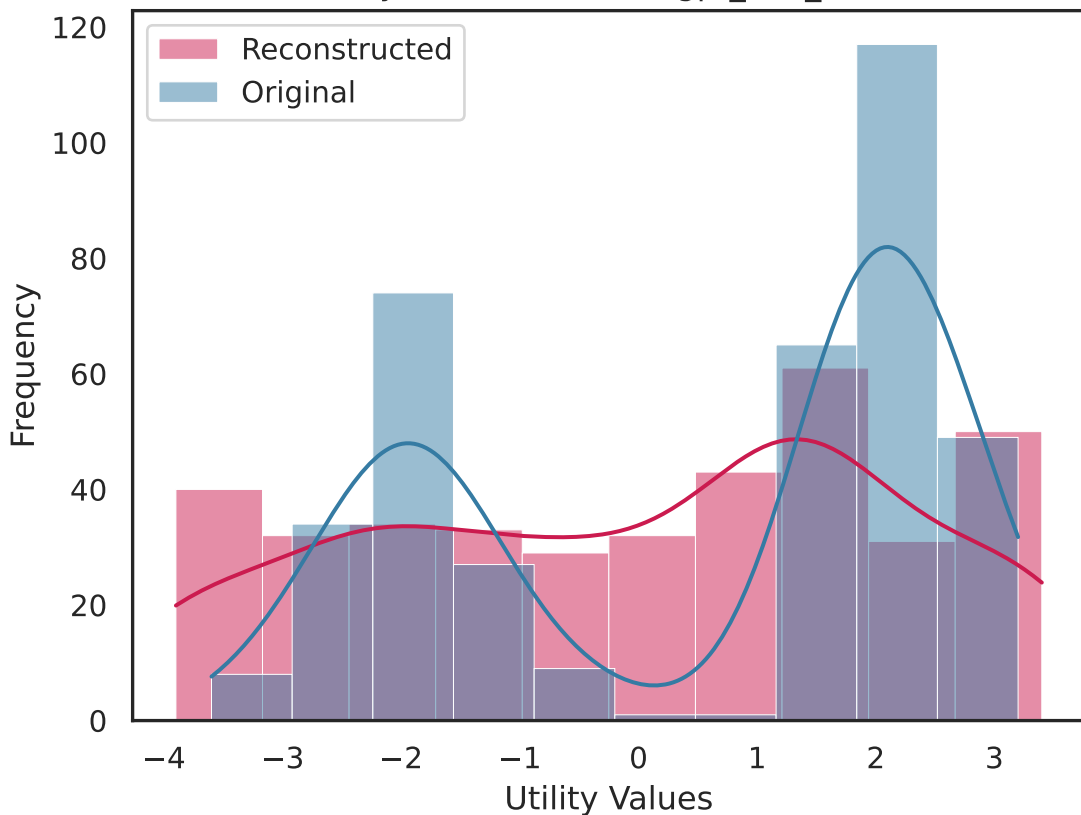

Supplement: supplementary_material [file attachment]

Distribution of reconstruction errors for pythia\_160m utility values

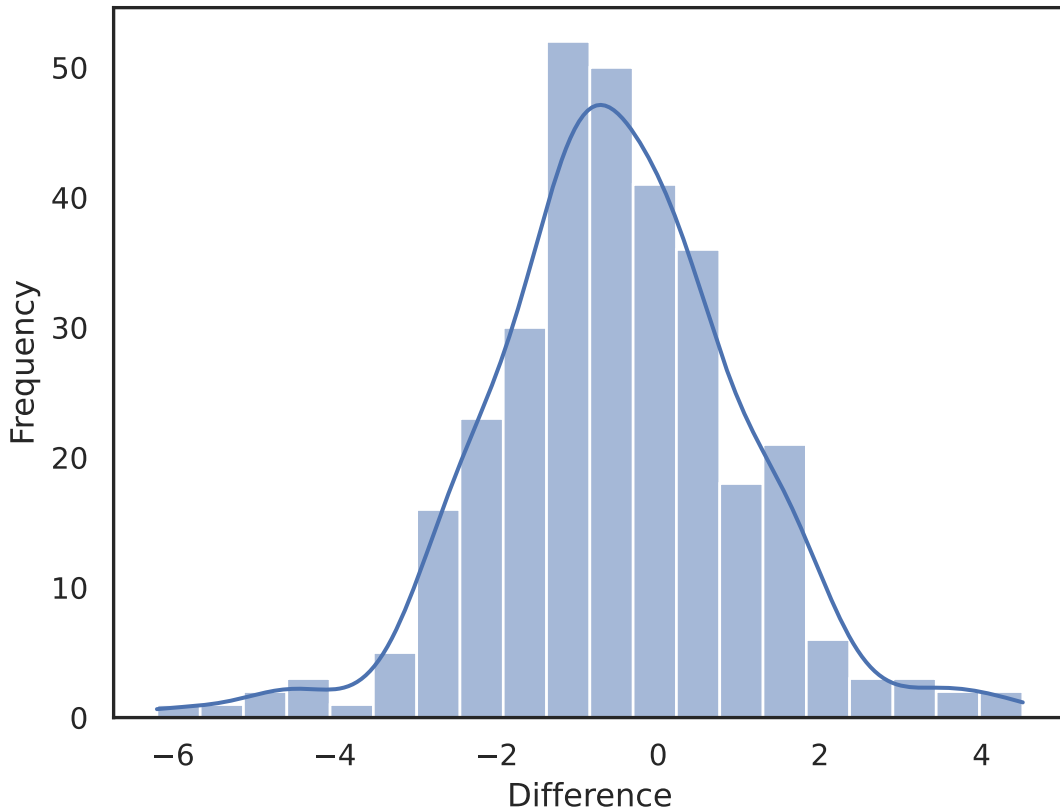

Supplement: supplementary_material [file attachment]

Utility Distributions for pythia\_160m

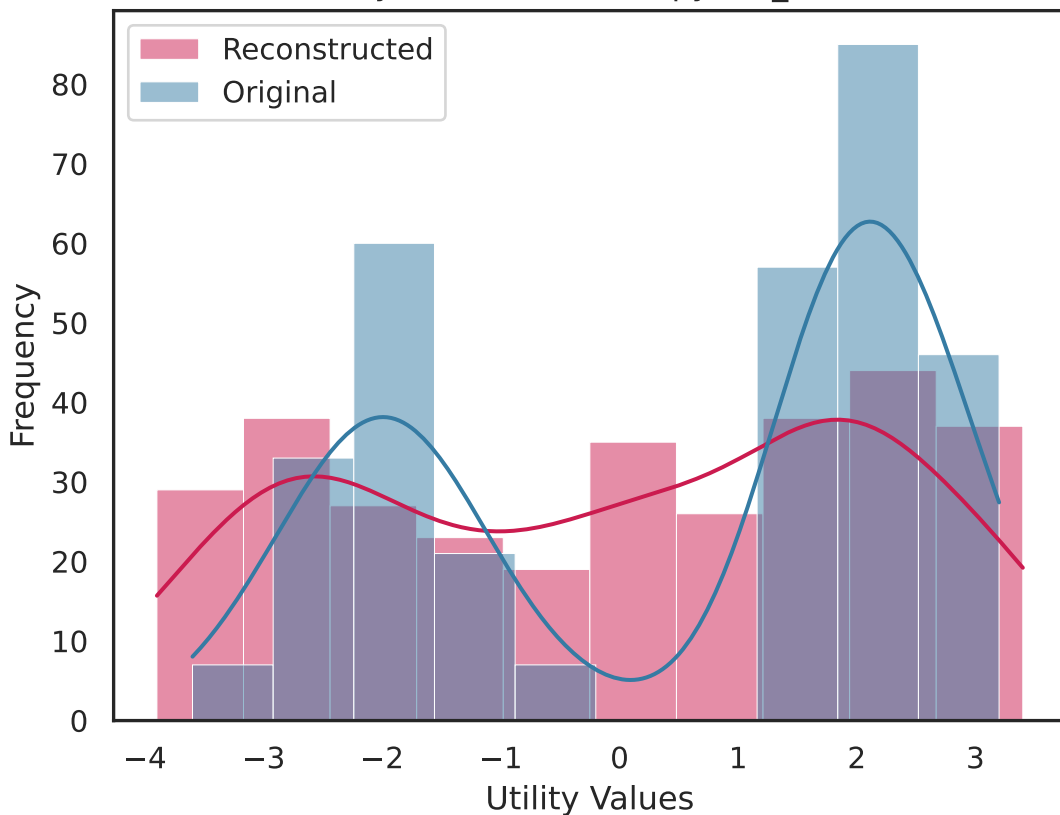

Supplement: supplementary_material [file attachment]
